# Supplementary material for: MicroRNA Profiling in the Medial and Lateral Habenula of Rats Exposed to the Learned Helplessness Paradigm: Candidate Biomarkers for Susceptibility and Resilience to Inescapable Shock
Source: PLoS One. 2016 Aug 5;11(8):e0160318. doi: 10.1371/journal.pone.0160318 (PMC4975463; doi:10.1371/journal.pone.0160318)
Supplement: S1 Table — (XLSX) [file pone.0160318.s003.xlsx]

## Sheet: Medial Habenula miRNAs
Detector	miRNA	NLH RQ	LH RQ	P-value	FDR
mmu-let-7a-4373169	mmu-let-7a	1.04306	0.992275	0.922708	0.960071
mmu-let-7b-4373168	mmu-let-7b	1.15115	1.05994	0.0496335	0.518394
mmu-let-7c-4373167	mmu-let-7c	1.25256	1.18848	0.0486474	0.518394
mmu-let-7d-4395394	mmu-let-7d	1.17738	1.15276	0.238058	0.644231
mmu-let-7e-4395517	mmu-let-7e	1.38344	1.44858	0.224633	0.644231
mmu-let-7f-4373164	mmu-let-7f	1.16233	1.09167	0.377345	0.699888
mmu-let-7g-4395393	mmu-let-7g	1.18897	1.1211	0.324037	0.67707
mmu-let-7i-4395332	mmu-let-7i	1.14013	1.06236	0.407795	0.727836
mmu-miR-100-4373160	mmu-miR-100	0.961985	0.95464	0.675076	0.857529
mmu-miR-101a-4395364	mmu-miR-101a	1.08968	0.905093	0.757589	0.900856
mmu-miR-103-4373158	mmu-miR-103	1.10526	0.908735	0.235562	0.644231
mmu-miR-106a-4395589	mmu-miR-106a	1.13133	1.1473	0.286117	0.664097
mmu-miR-106b-4373155	mmu-miR-106b	1.1582	0.992855	0.275762	0.653918
mmu-miR-107-4373154	mmu-miR-107	1.16032	1.30272	0.0330732	0.466332
mmu-miR-10a-4373153	mmu-miR-10a	1.70367	1.17924	0.133952	0.638265
mmu-miR-124-4373295	mmu-miR-124	1.19651	1.09637	0.397054	0.722383
mmu-miR-125a-3p-4395310	mmu-miR-125a-3p	1.3168	1.56437	0.426661	0.733971
mmu-miR-125a-5p-4395309	mmu-miR-125a-5p	1.19259	1.18268	0.194083	0.644231
mmu-miR-125b-3p-4395489	mmu-miR-125b-3p	1.43809	1.45926	0.44039	0.74039
mmu-miR-125b-5p-4373148	mmu-miR-125b-5p	1.10663	0.989033	0.0948882	0.598179
mmu-miR-126-3p-4395339	mmu-miR-126-3p	1.05568	1.04273	0.928087	0.960071
mmu-miR-126-5p-4373269	mmu-miR-126-5p	1.16282	1.06526	0.441908	0.74039
mmu-miR-127-4373147	mmu-miR-127	1.08554	1.02789	0.564448	0.824737
mmu-miR-128a-4395327	mmu-miR-128a	1.12376	1.11936	0.554465	0.818634
mmu-miR-129-3p-4373297	mmu-miR-129-3p	1.02627	1.09228	0.778528	0.903477
mmu-miR-129-5p-4373171	mmu-miR-129-5p	1.3547	1.38043	0.330097	0.67707
mmu-miR-130a-4373145	mmu-miR-130a	1.01539	0.889198	0.843471	0.911897
mmu-miR-130b-4373144	mmu-miR-130b	1.1709	1.01355	0.636215	0.848733
mmu-miR-132-4373143	mmu-miR-132	1.0619	1.13686	0.247319	0.644231
mmu-miR-133a-4395357	mmu-miR-133a	1.11556	1.04507	0.717148	0.883158
mmu-miR-133b-4395358	mmu-miR-133b	1.62429	1.16972	0.0123032	0.433689
mmu-miR-134-4373299	mmu-miR-134	1.1407	1.22806	0.263915	0.644231
mmu-miR-135a-4373140	mmu-miR-135a	1.28199	1.04404	0.218654	0.644231
mmu-miR-135b-4395372	mmu-miR-135b	1.0316	0.860778	0.48251	0.768745
mmu-miR-136-4395641	mmu-miR-136	1.32455	1.28979	0.304705	0.675407
mmu-miR-137-4373301	mmu-miR-137	1.24379	1.02805	0.145142	0.6436
mmu-miR-138-4395395	mmu-miR-138	1.03716	1.21089	0.244142	0.644231
mmu-miR-139-3p-4395676	mmu-miR-139-3p	1.08242	1.17433	0.217771	0.644231
mmu-miR-139-5p-4395400	mmu-miR-139-5p	1.22495	1.2086	0.137863	0.638265
mmu-miR-140-4373374	mmu-miR-140	1.22117	1.23454	0.0658682	0.580464
mmu-miR-142-3p-4373136	mmu-miR-142-3p	1.16178	0.925738	0.585298	0.836042
mmu-miR-142-5p-4395359	mmu-miR-142-5p	0.441227	1.1777	0.253264	0.644231
mmu-miR-143-4395360	mmu-miR-143	1.2763	1.10813	0.0933942	0.598179
mmu-miR-1-4395333	mmu-miR-1	1.53584	0.681389	0.117148	0.635302
mmu-miR-145-4395389	mmu-miR-145	1.66164	1.32883	0.218857	0.644231
mmu-miR-146a-4373132	mmu-miR-146a	1.24768	0.94842	0.443709	0.74039
mmu-miR-146b-4373178	mmu-miR-146b	1.07931	1.082	0.651991	0.848733
mmu-miR-147-4395373	mmu-miR-147	104.229	4.54405	0.0234035	0.436677
mmu-miR-148a-4373130	mmu-miR-148a	1.21017	1.02046	0.145371	0.6436
mmu-miR-148b-4373129	mmu-miR-148b	1.18598	1.11433	0.160147	0.644231
mmu-miR-150-4373127	mmu-miR-150	0.99258	1.00948	0.974432	0.98167
mmu-miR-151-3p-4373304	mmu-miR-151-3p	1.03689	1.04161	0.654114	0.848733
mmu-miR-152-4395170	mmu-miR-152	1.16916	1.23886	0.138064	0.638265
mmu-miR-153-4373305	mmu-miR-153	1.2559	0.98458	0.102339	0.604376
mmu-miR-154-4373270	mmu-miR-154	1.64209	1.11573	0.306568	0.675407
mmu-miR-155-4395701	mmu-miR-155	1.00215	0.926879	0.633053	0.848733
mmu-miR-15a-4373123	mmu-miR-15a	1.42419	1.11509	0.0694296	0.593307
mmu-miR-15b-4373122	mmu-miR-15b	1.20265	1.1216	0.102997	0.604376
mmu-miR-16-4373121	mmu-miR-16	1.0511	0.95935	0.547042	0.817685
mmu-miR-17-4395419	mmu-miR-17	1.12916	1.18564	0.201768	0.644231
mmu-miR-181a-4373117	mmu-miR-181a	1.07145	1.03801	0.550923	0.817685
mmu-miR-181c-4373115	mmu-miR-181c	0.989989	0.950899	0.927244	0.960071
mmu-miR-182-4395729	mmu-miR-182	1.08181	1.00906	0.806966	0.907162
mmu-miR-184-4373113	mmu-miR-184	1.05039	1.04002	0.84399	0.911897
mmu-miR-185-4395382	mmu-miR-185	1.09546	1.00404	0.835464	0.911897
mmu-miR-186-4395396	mmu-miR-186	1.16701	1.3054	0.32673	0.67707
mmu-miR-187-4373307	mmu-miR-187	1.08222	1.21404	0.121066	0.636033
mmu-miR-188-5p-4395431	mmu-miR-188-5p	1.16673	1.02988	0.807397	0.907162
mmu-miR-18a-4395533	mmu-miR-18a	1.1264	1.15525	0.785629	0.907162
mmu-miR-18b-4395596	mmu-miR-18b	430.843	637.214	2.5688e-05	0.0014488
mmu-miR-190-4373110	mmu-miR-190	1.12308	1.06177	0.626666	0.848733
mmu-miR-191-4395410	mmu-miR-191	0.98043	1.0825	0.62111	0.848733
mmu-miR-192-4373108	mmu-miR-192	1.11114	1.12441	0.600331	0.846466
mmu-miR-193-4395361	mmu-miR-193	1.99959	2.03898	0.379727	0.699888
mmu-miR-193b-4395597	mmu-miR-193b	1.07282	1.13004	0.476533	0.763535
mmu-miR-194-4373106	mmu-miR-194	1.21588	0.940696	0.625209	0.848733
mmu-miR-195-4373105	mmu-miR-195	1.04545	0.886247	0.587008	0.836042
mmu-miR-197-4373102	mmu-miR-197	1.14809	1.2197	0.528708	0.797303
mmu-miR-199a-3p-4395415	mmu-miR-199a-3p	1.41249	1.07909	0.0576154	0.56026
mmu-miR-199a-5p-4373272	mmu-miR-199a-5p	0.040232	0.0150353	0.0214883	0.436677
mmu-miR-19a-4373099	mmu-miR-19a	1.01674	1.0264	0.987257	0.99077
mmu-miR-19b-4373098	mmu-miR-19b	1.13668	1.00652	0.656113	0.848733
mmu-miR-200c-4395411	mmu-miR-200c	1.72232	1.73726	0.114843	0.635016
mmu-miR-202-3p-4373311	mmu-miR-202-3p	1.62834	0.756254	0.251329	0.644231
mmu-miR-203-4373095	mmu-miR-203	1.32276	1.07935	0.101876	0.604376
mmu-miR-204-4373094	mmu-miR-204	1.13433	1.09084	0.46544	0.757698
mmu-miR-205-4373093	mmu-miR-205	0.0402013	0.451809	0.148326	0.6436
mmu-miR-207-4373314	mmu-miR-207	0.000468822	0.00698982	0.0260533	0.436677
mmu-miR-20a-4373286	mmu-miR-20a	1.35365	1.23879	0.0903482	0.598179
mmu-miR-20b-4373263	mmu-miR-20b	1.20083	1.05274	0.52204	0.795758
mmu-miR-210-4373089	mmu-miR-210	1.12359	1.07619	0.203036	0.644231
mmu-miR-21-4373090	mmu-miR-21	1.22648	1.05455	0.278263	0.653918
mmu-miR-214-4395417	mmu-miR-214	0.00925829	0.00102299	0.038607	0.474279
mmu-miR-215-4373316	mmu-miR-215	0.816338	1.00553	0.65329	0.848733
mmu-miR-216a-4395331	mmu-miR-216a	224.553	138.656	1.46616e-05	0.00103364
mmu-miR-216b-4395437	mmu-miR-216b	0.920305	1.53469	0.696261	0.865128
mmu-miR-217-4395686	mmu-miR-217	1.11896	1.0321	0.918964	0.960071
mmu-miR-218-4373081	mmu-miR-218	1.18926	1.00387	0.168352	0.644231
mmu-miR-219-4373080	mmu-miR-219	1.19066	0.984027	0.232523	0.644231
mmu-miR-221-4373077	mmu-miR-221	1.20637	1.14665	0.210541	0.644231
mmu-miR-222-4395387	mmu-miR-222	1.00817	1.04856	0.92826	0.960071
mmu-miR-223-4395406	mmu-miR-223	1.07325	0.953077	0.807438	0.907162
mmu-miR-224-4395683	mmu-miR-224	1.65917	1.74458	0.662525	0.849237
mmu-miR-23a-4373074	mmu-miR-23a	1.67706	1.25962	0.108268	0.610629
mmu-miR-23b-4373073	mmu-miR-23b	1.23236	1.11221	0.220674	0.644231
mmu-miR-24-4373072	mmu-miR-24	1.07858	1.14206	0.0218908	0.436677
mmu-miR-25-4373071	mmu-miR-25	1.23342	1.14442	0.169444	0.644231
mmu-miR-26a-4395166	mmu-miR-26a	1.08412	1.04733	0.665676	0.849414
mmu-miR-26b-4395167	mmu-miR-26b	1.10964	1.01569	0.650213	0.848733
mmu-miR-27a-4373287	mmu-miR-27a	1.12128	1.04196	0.638565	0.848733
mmu-miR-27b-4373068	mmu-miR-27b	1.13423	1.01723	0.252161	0.644231
mmu-miR-28-4373067	mmu-miR-28	1.20599	1.19357	0.0629771	0.572888
mmu-miR-291a-3p-4395722	mmu-miR-291a-3p	4.04824	0.0570388	6.28876e-06	0.000591143
mmu-miR-292-3p-4395723	mmu-miR-292-3p	0.400114	0.959171	0.316919	0.67707
mmu-miR-296-5p-4373066	mmu-miR-296-5p	1.17893	1.04666	0.577239	0.834777
mmu-miR-297c-4395610	mmu-miR-297c	1.07372	1.42963	0.354075	0.693397
mmu-miR-298-4395728	mmu-miR-298	1.70523	1.13017	0.364937	0.698672
mmu-miR-29a-4395223	mmu-miR-29a	1.20626	0.945806	0.299505	0.670322
mmu-miR-29b-4373288	mmu-miR-29b	1.14976	0.895449	0.211388	0.644231
mmu-miR-29c-4395171	mmu-miR-29c	1.04617	0.891319	0.770233	0.900856
mmu-miR-301a-4373064	mmu-miR-301a	1.27409	1.03046	0.226358	0.644231
mmu-miR-301b-4395730	mmu-miR-301b	0.855143	0.752731	0.801995	0.907162
mmu-miR-302a-4378070	mmu-miR-302a	7.69646	41.5201	7.75812e-05	0.00364632
mmu-miR-30a-4373061	mmu-miR-30a	1.16176	1.08321	0.105016	0.604376
mmu-miR-30b-4373290	mmu-miR-30b	1.19829	1.09728	0.228081	0.644231
mmu-miR-30c-4373060	mmu-miR-30c	1.12903	1.11371	0.470202	0.757698
mmu-miR-30d-4373059	mmu-miR-30d	1.12136	1.04188	0.157747	0.644231
mmu-miR-30e-4395334	mmu-miR-30e	1.20334	1.04125	0.0859829	0.598179
mmu-miR-31-4373331	mmu-miR-31	1.16135	1.16537	0.487784	0.771797
mmu-miR-320-4395388	mmu-miR-320	0.938727	1.01356	0.519578	0.795758
mmu-miR-322-4378107	mmu-miR-322	1.29879	1.05721	0.135893	0.638265
mmu-miR-323-3p-4395338	mmu-miR-323-3p	1.17754	1.10774	0.319177	0.67707
mmu-miR-32-4395220	mmu-miR-32	1.02324	1.00519	0.998805	0.998805
mmu-miR-324-3p-4395639	mmu-miR-324-3p	1.08872	1.131	0.460936	0.75572
mmu-miR-324-5p-4373052	mmu-miR-324-5p	1.23211	1.05538	0.0812475	0.598179
mmu-miR-325-4395640	mmu-miR-325	1.13727	1.06339	0.377308	0.699888
mmu-miR-328-4373049	mmu-miR-328	1.21454	1.15695	0.0954541	0.598179
mmu-miR-329-4373336	mmu-miR-329	1.22596	1.19047	0.158649	0.644231
mmu-miR-330-4395341	mmu-miR-330	1.15298	1.01912	0.293079	0.664097
mmu-miR-331-3p-4373046	mmu-miR-331-3p	1.09577	1.07611	0.635962	0.848733
mmu-miR-331-5p-4395344	mmu-miR-331-5p	1.40995	1.28914	0.0377236	0.474279
mmu-miR-335-3p-4395296	mmu-miR-335-3p	1.01757	1.06915	0.877266	0.933543
mmu-miR-335-5p-4373045	mmu-miR-335-5p	1.02079	0.818471	0.194066	0.644231
mmu-miR-337-3p-4395662	mmu-miR-337-3p	1.27735	0.846251	0.358103	0.696449
mmu-miR-337-5p-4395645	mmu-miR-337-5p	1.16744	1.02786	0.0819299	0.598179
mmu-miR-338-3p-4395363	mmu-miR-338-3p	2.58789	1.57781	0.696398	0.865128
mmu-miR-339-5p-4395368	mmu-miR-339-5p	1.50354	1.28921	0.121794	0.636033
mmu-miR-340-3p-4395370	mmu-miR-340-3p	1.1691	1.10296	0.401813	0.725863
mmu-miR-340-5p-4395369	mmu-miR-340-5p	1.28971	0.981294	0.131412	0.638265
mmu-miR-342-3p-4395371	mmu-miR-342-3p	1.12884	0.982808	0.489899	0.771797
mmu-miR-342-5p-4395657	mmu-miR-342-5p	1.71324	1.39854	0.204202	0.644231
mmu-miR-344-4373340	mmu-miR-344	1.48802	1.15995	0.0747041	0.598179
mmu-miR-345-3p-4395659	mmu-miR-345-3p	1.13574	1.05442	0.964707	0.98167
mmu-miR-345-5p-4395658	mmu-miR-345-5p	1.3064	1.04549	0.17459	0.644231
mmu-miR-34a-4395168	mmu-miR-34a	1.4452	0.930283	0.233571	0.644231
mmu-miR-34b-3p-4395748	mmu-miR-34b-3p	1.04056	0.936778	0.954269	0.97856
mmu-miR-34c-4373036	mmu-miR-34c	1.35252	0.959671	0.613107	0.848733
mmu-miR-350-4395660	mmu-miR-350	0.960362	0.936271	0.92943	0.960071
mmu-miR-351-4373345	mmu-miR-351	1.03638	1.20423	0.558825	0.820774
mmu-miR-361-4373035	mmu-miR-361	1.21586	1.24694	0.0485856	0.518394
mmu-miR-362-3p-4395746	mmu-miR-362-3p	1.39034	1.2075	0.252141	0.644231
mmu-miR-363-4378090	mmu-miR-363	1.10654	1.05249	0.855585	0.917395
mmu-miR-365-4373194	mmu-miR-365	1.01002	0.905704	0.622798	0.848733
mmu-miR-369-3p-4373032	mmu-miR-369-3p	1.27046	0.805389	0.199762	0.644231
mmu-miR-369-5p-4373195	mmu-miR-369-5p	1.65775	1.30914	0.586848	0.836042
mmu-miR-370-4395386	mmu-miR-370	1.22673	1.32727	0.430487	0.735742
mmu-miR-375-4373027	mmu-miR-375	1.19151	0.934061	0.791789	0.907162
mmu-miR-376a-4373347	mmu-miR-376a	1.20818	0.915393	0.824399	0.911897
mmu-miR-376b-4395582	mmu-miR-376b	1.12973	1.00664	0.682943	0.863633
mmu-miR-376c-4395580	mmu-miR-376c	1.2146	1.00615	0.549517	0.817685
mmu-miR-379-4373349	mmu-miR-379	1.17167	1.01455	0.34781	0.690721
mmu-miR-380-3p-4373350	mmu-miR-380-3p	1.11593	0.611557	0.512812	0.794252
mmu-miR-380-5p-4395731	mmu-miR-380-5p	1.32787	1.12981	0.265003	0.644231
mmu-miR-381-4373020	mmu-miR-381	1.19687	0.992362	0.744087	0.892904
mmu-miR-382-4373019	mmu-miR-382	1.06546	1.02196	0.811624	0.908246
mmu-miR-383-4381093	mmu-miR-383	1.05401	1.2344	0.148347	0.6436
mmu-miR-384-3p-4395733	mmu-miR-384-3p	1.0915	0.956927	0.379494	0.699888
mmu-miR-384-5p-4395732	mmu-miR-384-5p	1.24928	1.16684	0.259698	0.644231
mmu-miR-409-3p-4395443	mmu-miR-409-3p	1.00678	1.05515	0.717174	0.883158
mmu-miR-409-5p-4395442	mmu-miR-409-5p	1.11387	0.948307	0.630527	0.848733
mmu-miR-410-4378093	mmu-miR-410	1.05326	0.939436	0.647228	0.848733
mmu-miR-411-4381013	mmu-miR-411	1.15373	1.00573	0.331332	0.67707
mmu-miR-423-5p-4395451	mmu-miR-423-5p	1.21268	1.08637	0.74333	0.892904
mmu-miR-425-4380926	mmu-miR-425	1082.68	0.0357373	0.0265648	0.436677
mmu-miR-431-4395173	mmu-miR-431	1.97753	2.16541	0.351389	0.69295
mmu-miR-433-4373205	mmu-miR-433	1.20349	1.11108	0.249779	0.644231
mmu-miR-434-3p-4395734	mmu-miR-434-3p	1.33989	1.32096	0.261239	0.644231
mmu-miR-434-5p-4395711	mmu-miR-434-5p	1.61634	1.4715	0.294369	0.664097
mmu-miR-448-4373206	mmu-miR-448	3.16952	0.882068	0.0216517	0.436677
mmu-miR-449a-4373207	mmu-miR-449a	1.26579	1.18561	0.925726	0.960071
mmu-miR-450a-5p-4395414	mmu-miR-450a-5p	1.00028	1.05746	0.974707	0.98167
mmu-miR-451-4373360	mmu-miR-451	1.17232	0.799018	0.737952	0.892904
mmu-miR-452-4373281	mmu-miR-452	39.6743	40.6283	0.179681	0.644231
mmu-miR-455-4395585	mmu-miR-455	1.20156	1.06027	0.690072	0.86489
mmu-miR-465a-5p-4373363	mmu-miR-465a-5p	1.51325	1.40301	0.383527	0.702303
mmu-miR-467a-4395717	mmu-miR-467a	0.842489	45.234	6.37123e-08	8.98343e-06
mmu-miR-467c-4395647	mmu-miR-467c	53.8697	7.0658	0.336866	0.683426
mmu-miR-467e-4395698	mmu-miR-467e	435.453	7.61933	0.0278022	0.436677
mmu-miR-484-4381032	mmu-miR-484	1.2192	1.25606	0.515419	0.794252
mmu-miR-486-4378096	mmu-miR-486	1.0057	1.06497	0.804176	0.907162
mmu-miR-487b-4378102	mmu-miR-487b	1.19855	1.06983	0.436944	0.74039
mmu-miR-488-4381074	mmu-miR-488	1.35345	1.20625	0.418086	0.731475
mmu-miR-490-4373215	mmu-miR-490	6904.42	1.10403	1.00849e-08	2.84393e-06
mmu-miR-494-4395476	mmu-miR-494	1.11	1.01787	0.420209	0.731475
mmu-miR-495-4381078	mmu-miR-495	1.16895	1.01003	0.201244	0.644231
mmu-miR-496-4386771	mmu-miR-496	1.16573	0.964161	0.415532	0.731475
mmu-miR-497-4381046	mmu-miR-497	1.13424	0.927171	0.201678	0.644231
mmu-miR-499-4381047	mmu-miR-499	1.60747	0.956704	0.125456	0.638265
mmu-miR-500-4395736	mmu-miR-500	1.1864	0.952616	0.459633	0.75572
mmu-miR-503-4395586	mmu-miR-503	1.96036	1.16999	0.634082	0.848733
mmu-miR-509-3p-4395651	mmu-miR-509-3p	1.08859	0.977341	0.936214	0.963549
mmu-miR-532-3p-4395466	mmu-miR-532-3p	1.19984	1.23251	0.0776215	0.598179
mmu-miR-532-5p-4380928	mmu-miR-532-5p	1.28823	0.990466	0.501371	0.783466
mmu-miR-539-4378103	mmu-miR-539	1.24696	1.19123	0.502863	0.783466
mmu-miR-540-3p-4378119	mmu-miR-540-3p	1.88317	2.16461	0.203947	0.644231
mmu-miR-540-5p-4395691	mmu-miR-540-5p	1.86684	1.09916	0.177446	0.644231
mmu-miR-542-3p-4378101	mmu-miR-542-3p	0.819584	0.795419	0.793036	0.907162
mmu-miR-542-5p-4395693	mmu-miR-542-5p	2.92665	2.47753	0.524886	0.795795
mmu-miR-543-4395487	mmu-miR-543	1.284	1.14524	0.232566	0.644231
mmu-miR-544-4395680	mmu-miR-544	1.34512	1.01636	0.0558945	0.56026
mmu-miR-546-4381044	mmu-miR-546	0.735331	0.803193	0.570717	0.829598
mmu-miR-551b-4380945	mmu-miR-551b	1.39954	1.06217	0.0386824	0.474279
mmu-miR-574-3p-4395460	mmu-miR-574-3p	0.874053	0.91391	0.815403	0.908869
mmu-miR-582-3p-4395697	mmu-miR-582-3p	0.837183	0.934939	0.841656	0.911897
mmu-miR-582-5p-4395696	mmu-miR-582-5p	1.25055	1.10256	0.322997	0.67707
mmu-miR-598-4395606	mmu-miR-598	1.24998	1.0016	0.0783512	0.598179
mmu-miR-652-4395463	mmu-miR-652	1.09932	1.09184	0.63011	0.848733
mmu-miR-665-4395737	mmu-miR-665	0.998184	0.666903	0.277304	0.653918
mmu-miR-667-4386769	mmu-miR-667	0.968998	1.06028	0.773075	0.900856
mmu-miR-668-4386767	mmu-miR-668	1.25838	1.11001	0.346206	0.690721
mmu-miR-671-3p-4395433	mmu-miR-671-3p	1.15002	1.27436	0.294279	0.664097
mmu-miR-672-4395438	mmu-miR-672	1.19523	1.11629	0.346796	0.690721
mmu-miR-674-4395193	mmu-miR-674	1.05242	1.06647	0.686756	0.864577
mmu-miR-676-4386776	mmu-miR-676	0.0839316	82.4325	0.0208407	0.436677
mmu-miR-680-4381079	mmu-miR-680	28.2921	0.786706	0.223814	0.644231
mmu-miR-682-4381081	mmu-miR-682	0.758048	1.24452	0.274169	0.653918
mmu-miR-685-4386748	mmu-miR-685	1.09969	1.10269	0.740482	0.892904
mmu-miR-708-4395452	mmu-miR-708	1.30435	1.22695	0.0869144	0.598179
mmu-miR-744-4395435	mmu-miR-744	1.01312	0.960114	0.734359	0.892904
mmu-miR-770-3p-4395564	mmu-miR-770-3p	0.83781	0.875768	0.831247	0.911897
mmu-miR-7a-4378130	mmu-miR-7a	1.11039	1.00604	0.76032	0.900856
mmu-miR-7b-4395685	mmu-miR-7b	0.922068	0.957949	0.836303	0.911897
mmu-miR-802-4395566	mmu-miR-802	1.55618	1.12857	0.418383	0.731475
mmu-miR-872-4395375	mmu-miR-872	1.19227	0.924145	0.426848	0.733971
mmu-miR-873-4395467	mmu-miR-873	2.75974	2.78655	0.330665	0.67707
mmu-miR-874-4395379	mmu-miR-874	1.8262	1.28939	0.254949	0.644231
mmu-miR-879-4395602	mmu-miR-879	1.78266	1.00919	0.214257	0.644231
mmu-miR-92a-4373013	mmu-miR-92a	0.940537	0.926783	0.831636	0.911897
mmu-miR-93-4373302	mmu-miR-93	1.27875	1.22971	0.0108096	0.433689
mmu-miR-9-4373285	mmu-miR-9	1.14561	1.12471	0.591432	0.83811
mmu-miR-98-4373009	mmu-miR-98	1.30854	0.934604	0.024776	0.436677
mmu-miR-99a-4373008	mmu-miR-99a	1.13881	0.985475	0.260703	0.644231
mmu-miR-99b-4373007	mmu-miR-99b	1.09938	1.1347	0.377128	0.699888
rno-miR-1-4395765	rno-miR-1	1.08884	1.21807	0.743891	0.892904
rno-miR-17-3p-4395779	rno-miR-17-3p	1.34025	1.54169	0.467632	0.757698
rno-miR-190b-4395749	rno-miR-190b	1.11715	1.13936	0.957912	0.978736
rno-miR-207-4381096	rno-miR-207	0.949879	1.27501	0.404115	0.725863
rno-miR-20b-3p-4395753	rno-miR-20b-3p	0.882368	0.793693	0.771699	0.900856
rno-miR-219-1-3p-4395778	rno-miR-219-1-3p	1.59005	1.09091	0.450256	0.746895
rno-miR-219-2-3p-4395501	rno-miR-219-2-3p	1.01177	0.954193	0.747785	0.893539
rno-miR-224-4373187	rno-miR-224	2.10616	0.831365	0.289956	0.664097
rno-miR-333-4381109	rno-miR-333	1.66184	1.3551	0.0315653	0.466332
rno-miR-336-4381111	rno-miR-336	0.855612	1.26657	0.317542	0.67707
rno-miR-339-3p-4395760	rno-miR-339-3p	1.28309	1.23357	0.129717	0.638265
rno-miR-344-3p-4381112	rno-miR-344-3p	1.28637	1.13849	0.194743	0.644231
rno-miR-345-3p-4395762	rno-miR-345-3p	1.05649	1.03287	0.969016	0.98167
rno-miR-346-4381113	rno-miR-346	1.32005	1.21827	0.165827	0.644231
rno-miR-347-4381114	rno-miR-347	1.65326	1.50324	0.0600589	0.564553
rno-miR-349-4381115	rno-miR-349	0.0627403	0.932127	0.366679	0.698672
rno-miR-351-4395764	rno-miR-351	1.29631	1.25834	0.66136	0.849237
rno-miR-377-4381100	rno-miR-377	0.698345	0.56962	0.314789	0.67707
rno-miR-381-4381102	rno-miR-381	1.07568	0.95327	0.853769	0.917395
rno-miR-409-5p-4381098	rno-miR-409-5p	1.16446	1.0863	0.871297	0.930704
rno-miR-421-4381122	rno-miR-421	1.5376	1.11263	0.161732	0.644231
rno-miR-450a-4381124	rno-miR-450a	1.19578	0.957111	0.362936	0.698672
rno-miR-466b-4395767	rno-miR-466b	1.17734	0.921864	0.769387	0.900856
rno-miR-466c-4395768	rno-miR-466c	1.99684	0.060898	0.0875909	0.598179
rno-miR-505-4381097	rno-miR-505	1.48949	1.20361	0.027873	0.436677
rno-miR-532-5p-4395752	rno-miR-532-5p	1.32113	1.18986	0.183608	0.644231
rno-miR-598-5p-4395754	rno-miR-598-5p	1.29901	1.58525	0.0481847	0.518394
rno-miR-758-4395180	rno-miR-758	1.19617	1.09337	0.226945	0.644231

## Sheet: Lateral Habenula miRNAs
Detector	miRNA	NLH RQ	LH RQ	P-value	FDR
mmu-let-7a-4373169	mmu-let-7a	1.37223	1.1993	0.521265	0.999213
mmu-let-7b-4373168	mmu-let-7b	1.14201	0.997795	0.777304	0.999213
mmu-let-7c-4373167	mmu-let-7c	1.25444	1.15592	0.49366	0.999213
mmu-let-7d-4395394	mmu-let-7d	1.19718	1.05112	0.596648	0.999213
mmu-let-7e-4395517	mmu-let-7e	1.3802	1.08986	0.679412	0.999213
mmu-let-7f-4373164	mmu-let-7f	1.11944	0.929402	0.579371	0.999213
mmu-let-7g-4395393	mmu-let-7g	1.03593	0.916599	0.743505	0.999213
mmu-let-7i-4395332	mmu-let-7i	1.08583	0.927006	0.705654	0.999213
mmu-miR-100-4373160	mmu-miR-100	1.24798	1.08	0.391382	0.999213
mmu-miR-101a-4395364	mmu-miR-101a	1.09794	0.918393	0.61364	0.999213
mmu-miR-103-4373158	mmu-miR-103	1.26364	0.934528	0.342968	0.999213
mmu-miR-106a-4395589	mmu-miR-106a	1.06995	0.939493	0.625003	0.999213
mmu-miR-106b-4373155	mmu-miR-106b	1.16263	0.900036	0.416147	0.999213
mmu-miR-107-4373154	mmu-miR-107	1.14031	0.93785	0.609736	0.999213
mmu-miR-10a-4373153	mmu-miR-10a	1.2737	1.47305	0.347659	0.999213
mmu-miR-124-4373295	mmu-miR-124	0.998768	0.864244	0.66152	0.999213
mmu-miR-125a-3p-4395310	mmu-miR-125a-3p	1.01295	0.865935	0.819273	0.999213
mmu-miR-125a-5p-4395309	mmu-miR-125a-5p	1.05351	1.00227	0.913874	0.999213
mmu-miR-125b-3p-4395489	mmu-miR-125b-3p	0.939294	0.99149	0.931641	0.999213
mmu-miR-125b-5p-4373148	mmu-miR-125b-5p	1.17355	0.941479	0.543245	0.999213
mmu-miR-126-3p-4395339	mmu-miR-126-3p	1.07474	0.877884	0.526131	0.999213
mmu-miR-126-5p-4373269	mmu-miR-126-5p	1.0422	0.919399	0.785043	0.999213
mmu-miR-127-4373147	mmu-miR-127	1.03323	0.974688	0.942754	0.999213
mmu-miR-128a-4395327	mmu-miR-128a	1.11224	0.968589	0.766572	0.999213
mmu-miR-129-3p-4373297	mmu-miR-129-3p	1.1681	1.03262	0.661393	0.999213
mmu-miR-129-5p-4373171	mmu-miR-129-5p	1.04996	1.05637	0.848582	0.999213
mmu-miR-130a-4373145	mmu-miR-130a	1.07124	0.923154	0.740894	0.999213
mmu-miR-130b-4373144	mmu-miR-130b	0.999805	1.06888	0.916943	0.999213
mmu-miR-132-4373143	mmu-miR-132	1.13485	1.03856	0.704007	0.999213
mmu-miR-133a-4395357	mmu-miR-133a	1.09715	1.08582	0.862882	0.999213
mmu-miR-133b-4395358	mmu-miR-133b	1.19982	1.25393	0.692369	0.999213
mmu-miR-134-4373299	mmu-miR-134	0.992179	1.02533	0.974403	0.999213
mmu-miR-135a-4373140	mmu-miR-135a	1.24269	1.06416	0.63883	0.999213
mmu-miR-135b-4395372	mmu-miR-135b	0.889748	0.931546	0.782088	0.999213
mmu-miR-136-4395641	mmu-miR-136	1.08547	0.854365	0.517446	0.999213
mmu-miR-137-4373301	mmu-miR-137	1.0915	0.864482	0.505284	0.999213
mmu-miR-138-4395395	mmu-miR-138	0.945293	0.88817	0.692388	0.999213
mmu-miR-139-3p-4395676	mmu-miR-139-3p	1.03588	1.06858	0.936197	0.999213
mmu-miR-139-5p-4395400	mmu-miR-139-5p	1.0387	0.893898	0.600613	0.999213
mmu-miR-140-4373374	mmu-miR-140	1.09853	0.982033	0.69493	0.999213
mmu-miR-141-4373137	mmu-miR-141	1.15351	1.34585	0.539555	0.999213
mmu-miR-142-3p-4373136	mmu-miR-142-3p	1.2107	0.906514	0.633567	0.999213
mmu-miR-142-5p-4395359	mmu-miR-142-5p	1.31645	1.14375	0.788198	0.999213
mmu-miR-143-4395360	mmu-miR-143	1.18516	0.939655	0.487863	0.999213
mmu-miR-1-4395333	mmu-miR-1	1.17054	0.942112	0.611749	0.999213
mmu-miR-145-4395389	mmu-miR-145	0.964424	0.836754	0.792004	0.999213
mmu-miR-146a-4373132	mmu-miR-146a	0.988277	0.862119	0.782166	0.999213
mmu-miR-146b-4373178	mmu-miR-146b	0.97567	0.879327	0.63585	0.999213
mmu-miR-147-4395373	mmu-miR-147	0.922913	0.0256917	0.028274	0.999213
mmu-miR-148a-4373130	mmu-miR-148a	1.12525	0.981854	0.893707	0.999213
mmu-miR-148b-4373129	mmu-miR-148b	0.993674	0.936619	0.940968	0.999213
mmu-miR-150-4373127	mmu-miR-150	0.985684	0.919484	0.777701	0.999213
mmu-miR-151-3p-4373304	mmu-miR-151-3p	1.04956	0.9915	0.91726	0.999213
mmu-miR-152-4395170	mmu-miR-152	1.06018	0.829715	0.427953	0.999213
mmu-miR-153-4373305	mmu-miR-153	1.05924	0.793469	0.51023	0.999213
mmu-miR-154-4373270	mmu-miR-154	0.88036	1.02293	0.804613	0.999213
mmu-miR-155-4395701	mmu-miR-155	1.0146	0.915335	0.750564	0.999213
mmu-miR-15a-4373123	mmu-miR-15a	1.04431	0.821063	0.593754	0.999213
mmu-miR-15b-4373122	mmu-miR-15b	1.28995	1.18162	0.293543	0.999213
mmu-miR-16-4373121	mmu-miR-16	1.05126	1.01861	0.920348	0.999213
mmu-miR-17-4395419	mmu-miR-17	1.08369	0.905737	0.541967	0.999213
mmu-miR-181a-4373117	mmu-miR-181a	1.11969	0.990826	0.792123	0.999213
mmu-miR-181c-4373115	mmu-miR-181c	1.103	1.06167	0.851603	0.999213
mmu-miR-182-4395729	mmu-miR-182	2.01516	1.08987	0.68774	0.999213
mmu-miR-184-4373113	mmu-miR-184	1.51859	1.51037	0.223426	0.999213
mmu-miR-185-4395382	mmu-miR-185	1.05689	0.866134	0.46818	0.999213
mmu-miR-186-4395396	mmu-miR-186	0.927788	0.90742	0.728249	0.999213
mmu-miR-187-4373307	mmu-miR-187	0.953779	0.830895	0.513172	0.999213
mmu-miR-188-5p-4395431	mmu-miR-188-5p	1.01078	1.54065	0.383826	0.999213
mmu-miR-18a-4395533	mmu-miR-18a	0.974398	0.947667	0.96722	0.999213
mmu-miR-190-4373110	mmu-miR-190	1.11378	0.905588	0.627407	0.999213
mmu-miR-191-4395410	mmu-miR-191	1.0715	0.965777	0.622854	0.999213
mmu-miR-192-4373108	mmu-miR-192	0.951416	0.871762	0.808651	0.999213
mmu-miR-193-4395361	mmu-miR-193	0.869797	0.753531	0.519876	0.999213
mmu-miR-193b-4395597	mmu-miR-193b	1.02951	1.01968	0.981221	0.999213
mmu-miR-194-4373106	mmu-miR-194	1.39615	1.25959	0.414147	0.999213
mmu-miR-195-4373105	mmu-miR-195	1.08512	0.866494	0.490676	0.999213
mmu-miR-197-4373102	mmu-miR-197	0.900564	1.0864	0.341369	0.999213
mmu-miR-199a-3p-4395415	mmu-miR-199a-3p	1.44256	0.762587	0.327895	0.999213
mmu-miR-199a-5p-4373272	mmu-miR-199a-5p	13.5326	27.3107	0.046851	0.999213
mmu-miR-19a-4373099	mmu-miR-19a	1.20926	0.990565	0.626688	0.999213
mmu-miR-19b-4373098	mmu-miR-19b	1.27397	1.09721	0.447551	0.999213
mmu-miR-200b-4395362	mmu-miR-200b	0.0678396	12.5881	0.309936	0.999213
mmu-miR-200c-4395411	mmu-miR-200c	1.14376	1.17823	0.695176	0.999213
mmu-miR-202-3p-4373311	mmu-miR-202-3p	137.481	1.82412	0.169304	0.999213
mmu-miR-203-4373095	mmu-miR-203	1.15183	1.07951	0.764552	0.999213
mmu-miR-204-4373094	mmu-miR-204	0.975599	0.895146	0.860725	0.999213
mmu-miR-205-4373093	mmu-miR-205	1.38827	1.41806	0.324309	0.999213
mmu-miR-207-4373314	mmu-miR-207	0.0113194	0.0117458	0.220677	0.999213
mmu-miR-20a-4373286	mmu-miR-20a	1.24444	1.10752	0.473761	0.999213
mmu-miR-20b-4373263	mmu-miR-20b	1.13627	1.0026	0.634982	0.999213
mmu-miR-210-4373089	mmu-miR-210	1.17327	1.01381	0.683608	0.999213
mmu-miR-21-4373090	mmu-miR-21	1.27497	0.954871	0.522999	0.999213
mmu-miR-214-4395417	mmu-miR-214	1.22141	0.617227	0.243246	0.999213
mmu-miR-215-4373316	mmu-miR-215	1.14339	0.918322	0.228046	0.999213
mmu-miR-216a-4395331	mmu-miR-216a	1.04922	0.938685	0.86647	0.999213
mmu-miR-216b-4395437	mmu-miR-216b	1.00052	0.992529	0.998816	0.999213
mmu-miR-217-4395686	mmu-miR-217	0.997372	1.00489	0.999213	0.999213
mmu-miR-218-4373081	mmu-miR-218	1.03421	0.966187	0.933796	0.999213
mmu-miR-219-4373080	mmu-miR-219	1.17748	0.940246	0.656988	0.999213
mmu-miR-221-4373077	mmu-miR-221	1.06446	1.01171	0.849167	0.999213
mmu-miR-222-4395387	mmu-miR-222	0.959239	0.924236	0.856325	0.999213
mmu-miR-223-4395406	mmu-miR-223	1.10588	0.922236	0.625185	0.999213
mmu-miR-224-4395683	mmu-miR-224	2.43489	3.54505	0.0558337	0.999213
mmu-miR-23a-4373074	mmu-miR-23a	1.23956	0.836768	0.480876	0.999213
mmu-miR-23b-4373073	mmu-miR-23b	1.10266	0.918848	0.648777	0.999213
mmu-miR-24-4373072	mmu-miR-24	1.04226	0.90677	0.676295	0.999213
mmu-miR-25-4373071	mmu-miR-25	1.15042	0.998215	0.494936	0.999213
mmu-miR-26a-4395166	mmu-miR-26a	1.09002	0.921299	0.520052	0.999213
mmu-miR-26b-4395167	mmu-miR-26b	1.09405	0.900681	0.560094	0.999213
mmu-miR-27a-4373287	mmu-miR-27a	1.1321	1.03351	0.820985	0.999213
mmu-miR-27b-4373068	mmu-miR-27b	1.24789	0.898025	0.371169	0.999213
mmu-miR-28-4373067	mmu-miR-28	1.14782	0.956751	0.590052	0.999213
mmu-miR-291a-3p-4395722	mmu-miR-291a-3p	0.0382629	0.846056	0.0804084	0.999213
mmu-miR-292-3p-4395723	mmu-miR-292-3p	1.1091	1.1142	0.971269	0.999213
mmu-miR-296-5p-4373066	mmu-miR-296-5p	1.24646	1.05029	0.321305	0.999213
mmu-miR-297c-4395610	mmu-miR-297c	1.38871	0.936062	0.277336	0.999213
mmu-miR-298-4395728	mmu-miR-298	1.03075	0.933239	0.93446	0.999213
mmu-miR-29a-4395223	mmu-miR-29a	1.13159	0.878961	0.32925	0.999213
mmu-miR-29b-4373288	mmu-miR-29b	1.15432	0.893726	0.584452	0.999213
mmu-miR-29c-4395171	mmu-miR-29c	1.04312	0.889269	0.587182	0.999213
mmu-miR-301a-4373064	mmu-miR-301a	1.17208	1.00258	0.496609	0.999213
mmu-miR-301b-4395730	mmu-miR-301b	0.963588	0.815077	0.707211	0.999213
mmu-miR-302a-4378070	mmu-miR-302a	0.912644	0.790039	0.663932	0.999213
mmu-miR-30a-4373061	mmu-miR-30a	1.12405	0.89844	0.357412	0.999213
mmu-miR-30b-4373290	mmu-miR-30b	1.10829	0.982436	0.782074	0.999213
mmu-miR-30c-4373060	mmu-miR-30c	1.15553	0.928216	0.435216	0.999213
mmu-miR-30d-4373059	mmu-miR-30d	1.22842	0.965198	0.23791	0.999213
mmu-miR-30e-4395334	mmu-miR-30e	1.18181	0.9013	0.411731	0.999213
mmu-miR-31-4373331	mmu-miR-31	0.999222	1.06045	0.85934	0.999213
mmu-miR-320-4395388	mmu-miR-320	1.12784	1.04611	0.602645	0.999213
mmu-miR-322-4378107	mmu-miR-322	1.07183	0.855975	0.570092	0.999213
mmu-miR-323-3p-4395338	mmu-miR-323-3p	1.09727	1.07034	0.607481	0.999213
mmu-miR-32-4395220	mmu-miR-32	1.65179	1.1034	0.251936	0.999213
mmu-miR-324-3p-4395639	mmu-miR-324-3p	1.17934	1.09559	0.371553	0.999213
mmu-miR-324-5p-4373052	mmu-miR-324-5p	1.05849	1.00358	0.934895	0.999213
mmu-miR-325-4395640	mmu-miR-325	1.03606	1.08437	0.933998	0.999213
mmu-miR-328-4373049	mmu-miR-328	1.22658	1.07484	0.364919	0.999213
mmu-miR-329-4373336	mmu-miR-329	1.19779	1.03345	0.651482	0.999213
mmu-miR-330-4395341	mmu-miR-330	1.12917	0.886343	0.482013	0.999213
mmu-miR-331-3p-4373046	mmu-miR-331-3p	1.23605	0.925817	0.268967	0.999213
mmu-miR-331-5p-4395344	mmu-miR-331-5p	0.882009	1.16219	0.525969	0.999213
mmu-miR-335-3p-4395296	mmu-miR-335-3p	1.03623	0.980419	0.951447	0.999213
mmu-miR-335-5p-4373045	mmu-miR-335-5p	1.13032	0.870045	0.406238	0.999213
mmu-miR-337-3p-4395662	mmu-miR-337-3p	1.13296	0.930389	0.609009	0.999213
mmu-miR-337-5p-4395645	mmu-miR-337-5p	1.06807	0.961041	0.66989	0.999213
mmu-miR-338-3p-4395363	mmu-miR-338-3p	0.980262	0.647504	0.338026	0.999213
mmu-miR-339-5p-4395368	mmu-miR-339-5p	1.06882	1.06723	0.881999	0.999213
mmu-miR-340-3p-4395370	mmu-miR-340-3p	1.06481	0.95856	0.781763	0.999213
mmu-miR-340-5p-4395369	mmu-miR-340-5p	1.24992	1.11674	0.323583	0.999213
mmu-miR-342-3p-4395371	mmu-miR-342-3p	0.90387	1.00426	0.700057	0.999213
mmu-miR-342-5p-4395657	mmu-miR-342-5p	1.25589	1.20406	0.172611	0.999213
mmu-miR-344-4373340	mmu-miR-344	1.0545	1.11991	0.568952	0.999213
mmu-miR-345-3p-4395659	mmu-miR-345-3p	0.857774	0.873051	0.743617	0.999213
mmu-miR-345-5p-4395658	mmu-miR-345-5p	1.1214	0.993564	0.706481	0.999213
mmu-miR-34a-4395168	mmu-miR-34a	1.11928	0.976374	0.78198	0.999213
mmu-miR-34b-3p-4395748	mmu-miR-34b-3p	1.1752	1.02034	0.710451	0.999213
mmu-miR-34c-4373036	mmu-miR-34c	1.15875	1.01297	0.841256	0.999213
mmu-miR-350-4395660	mmu-miR-350	1.03201	0.913264	0.834857	0.999213
mmu-miR-351-4373345	mmu-miR-351	1.12728	1.10647	0.786002	0.999213
mmu-miR-361-4373035	mmu-miR-361	1.10429	0.977543	0.778296	0.999213
mmu-miR-362-3p-4395746	mmu-miR-362-3p	1.15806	0.815732	0.518017	0.999213
mmu-miR-363-4378090	mmu-miR-363	1.58229	1.20247	0.747287	0.999213
mmu-miR-365-4373194	mmu-miR-365	1.32588	0.910772	0.293599	0.999213
mmu-miR-367-4373034	mmu-miR-367	0.00251845	5.6922	3.20649e-06	0.00040188
mmu-miR-369-3p-4373032	mmu-miR-369-3p	1.27243	1.04343	0.571731	0.999213
mmu-miR-369-5p-4373195	mmu-miR-369-5p	1.22619	0.856584	0.347334	0.999213
mmu-miR-370-4395386	mmu-miR-370	1.15319	1.1858	0.188164	0.999213
mmu-miR-375-4373027	mmu-miR-375	0.955758	1.07575	0.965669	0.999213
mmu-miR-376a-4373347	mmu-miR-376a	1.10595	1.07245	0.77499	0.999213
mmu-miR-376b-4395582	mmu-miR-376b	1.05492	0.863494	0.707777	0.999213
mmu-miR-376c-4395580	mmu-miR-376c	1.18408	1.1388	0.480569	0.999213
mmu-miR-379-4373349	mmu-miR-379	1.11641	1.00439	0.685753	0.999213
mmu-miR-380-3p-4373350	mmu-miR-380-3p	1.24142	1.03313	0.265765	0.999213
mmu-miR-380-5p-4395731	mmu-miR-380-5p	1.08806	1.10499	0.66836	0.999213
mmu-miR-381-4373020	mmu-miR-381	1.2322	0.972096	0.580802	0.999213
mmu-miR-382-4373019	mmu-miR-382	1.04915	1.06931	0.91317	0.999213
mmu-miR-383-4381093	mmu-miR-383	0.949603	1.00153	0.904718	0.999213
mmu-miR-384-3p-4395733	mmu-miR-384-3p	1.11508	0.948186	0.803552	0.999213
mmu-miR-384-5p-4395732	mmu-miR-384-5p	1.15874	0.910295	0.353553	0.999213
mmu-miR-409-3p-4395443	mmu-miR-409-3p	1.0281	0.91758	0.670587	0.999213
mmu-miR-409-5p-4395442	mmu-miR-409-5p	1.11443	0.80327	0.343596	0.999213
mmu-miR-410-4378093	mmu-miR-410	1.08992	0.928614	0.620974	0.999213
mmu-miR-411-4381013	mmu-miR-411	1.06342	0.870483	0.507095	0.999213
mmu-miR-423-5p-4395451	mmu-miR-423-5p	1.12498	1.10033	0.708169	0.999213
mmu-miR-425-4380926	mmu-miR-425	1.24351	1.02626	0.585425	0.999213
mmu-miR-431-4395173	mmu-miR-431	0.962482	1.25681	0.469931	0.999213
mmu-miR-433-4373205	mmu-miR-433	1.01749	1.05791	0.914958	0.999213
mmu-miR-434-3p-4395734	mmu-miR-434-3p	0.999888	1.12872	0.343263	0.999213
mmu-miR-434-5p-4395711	mmu-miR-434-5p	1.10857	1.28443	0.165935	0.999213
mmu-miR-448-4373206	mmu-miR-448	1.2577	0.691326	0.159256	0.999213
mmu-miR-449a-4373207	mmu-miR-449a	0.894997	0.800416	0.827653	0.999213
mmu-miR-449b-4395669	mmu-miR-449b	322.033	8.01788	0.0222147	0.999213
mmu-miR-450a-5p-4395414	mmu-miR-450a-5p	1.10261	0.800927	0.511966	0.999213
mmu-miR-451-4373360	mmu-miR-451	1.212	0.827058	0.549152	0.999213
mmu-miR-452-4373281	mmu-miR-452	70.8717	53.9173	0.0716766	0.999213
mmu-miR-455-4395585	mmu-miR-455	1.16606	1.08503	0.835324	0.999213
mmu-miR-465a-5p-4373363	mmu-miR-465a-5p	0.956423	0.88615	0.955795	0.999213
mmu-miR-467c-4395647	mmu-miR-467c	585.421	311.616	5.07431e-07	0.000190794
mmu-miR-484-4381032	mmu-miR-484	0.934433	1.14442	0.228678	0.999213
mmu-miR-486-4378096	mmu-miR-486	1.06846	1.05257	0.897764	0.999213
mmu-miR-487b-4378102	mmu-miR-487b	1.1013	1.11649	0.577759	0.999213
mmu-miR-488-4381074	mmu-miR-488	0.875335	0.996088	0.692512	0.999213
mmu-miR-490-4373215	mmu-miR-490	1.13524	0.934717	0.812097	0.999213
mmu-miR-494-4395476	mmu-miR-494	1.01882	0.930001	0.861753	0.999213
mmu-miR-495-4381078	mmu-miR-495	1.1678	1.10311	0.735657	0.999213
mmu-miR-496-4386771	mmu-miR-496	0.962033	0.921481	0.912041	0.999213
mmu-miR-497-4381046	mmu-miR-497	1.10549	0.914003	0.636631	0.999213
mmu-miR-499-4381047	mmu-miR-499	1.28929	0.819916	0.257755	0.999213
mmu-miR-500-4395736	mmu-miR-500	1.20788	0.847973	0.415748	0.999213
mmu-miR-503-4395586	mmu-miR-503	1.38564	0.693388	0.476061	0.999213
mmu-miR-509-3p-4395651	mmu-miR-509-3p	1.2391	1.68662	0.231371	0.999213
mmu-miR-532-3p-4395466	mmu-miR-532-3p	1.01591	1.0385	0.954401	0.999213
mmu-miR-532-5p-4380928	mmu-miR-532-5p	1.11102	0.927895	0.601276	0.999213
mmu-miR-539-4378103	mmu-miR-539	1.02543	0.87278	0.497428	0.999213
mmu-miR-540-3p-4378119	mmu-miR-540-3p	1.06245	1.02872	0.936763	0.999213
mmu-miR-540-5p-4395691	mmu-miR-540-5p	1.31752	0.713057	0.207785	0.999213
mmu-miR-542-3p-4378101	mmu-miR-542-3p	1.59746	1.04033	0.0653309	0.999213
mmu-miR-542-5p-4395693	mmu-miR-542-5p	1.19358	1.06765	0.942835	0.999213
mmu-miR-543-4395487	mmu-miR-543	1.10776	1.1251	0.622924	0.999213
mmu-miR-544-4395680	mmu-miR-544	1.13155	0.936624	0.642894	0.999213
mmu-miR-546-4381044	mmu-miR-546	3.29314	0.899212	0.269374	0.999213
mmu-miR-547-4395694	mmu-miR-547	0.138645	0.0397722	0.0654888	0.999213
mmu-miR-551b-4380945	mmu-miR-551b	1.01427	0.848334	0.808245	0.999213
mmu-miR-574-3p-4395460	mmu-miR-574-3p	1.16338	0.997113	0.330109	0.999213
mmu-miR-582-3p-4395697	mmu-miR-582-3p	0.968827	0.694763	0.700071	0.999213
mmu-miR-582-5p-4395696	mmu-miR-582-5p	0.991697	0.759978	0.548557	0.999213
mmu-miR-590-5p-4395176	mmu-miR-590-5p	11.4593	9.61823	0.0990609	0.999213
mmu-miR-598-4395606	mmu-miR-598	1.08605	0.967089	0.868366	0.999213
mmu-miR-652-4395463	mmu-miR-652	1.10521	0.888014	0.32659	0.999213
mmu-miR-665-4395737	mmu-miR-665	1.17016	1.23357	0.404132	0.999213
mmu-miR-667-4386769	mmu-miR-667	1.11258	1.17666	0.624543	0.999213
mmu-miR-668-4386767	mmu-miR-668	1.15506	1.04037	0.697933	0.999213
mmu-miR-671-3p-4395433	mmu-miR-671-3p	0.961039	0.984601	0.921107	0.999213
mmu-miR-672-4395438	mmu-miR-672	1.15263	1.24886	0.331089	0.999213
mmu-miR-674-4395193	mmu-miR-674	1.11789	1.03305	0.795533	0.999213
mmu-miR-675-3p-4386762	mmu-miR-675-3p	0.107702	0.0252202	0.0937285	0.999213
mmu-miR-680-4381079	mmu-miR-680	1.71798	1.17117	0.261414	0.999213
mmu-miR-682-4381081	mmu-miR-682	0.843855	0.706186	0.927786	0.999213
mmu-miR-684-4381083	mmu-miR-684	3.69551	51.4838	0.01697	0.999213
mmu-miR-685-4386748	mmu-miR-685	1.00512	1.21307	0.466738	0.999213
mmu-miR-708-4395452	mmu-miR-708	1.09059	1.01574	0.806334	0.999213
mmu-miR-744-4395435	mmu-miR-744	1.04912	1.03722	0.935071	0.999213
mmu-miR-770-3p-4395564	mmu-miR-770-3p	1.00039	1.03706	0.960111	0.999213
mmu-miR-7a-4378130	mmu-miR-7a	0.964805	0.839399	0.767967	0.999213
mmu-miR-7b-4395685	mmu-miR-7b	1.08879	0.969193	0.789191	0.999213
mmu-miR-872-4395375	mmu-miR-872	0.850702	0.819642	0.666194	0.999213
mmu-miR-873-4395467	mmu-miR-873	0.828003	0.675975	0.767267	0.999213
mmu-miR-874-4395379	mmu-miR-874	1.20602	0.73948	0.356035	0.999213
mmu-miR-879-4395602	mmu-miR-879	1.32292	1.0358	0.776829	0.999213
mmu-miR-92a-4373013	mmu-miR-92a	1.00257	1.07615	0.735436	0.999213
mmu-miR-93-4373302	mmu-miR-93	1.06701	0.91906	0.579242	0.999213
mmu-miR-9-4373285	mmu-miR-9	1.18269	1.22647	0.181682	0.999213
mmu-miR-98-4373009	mmu-miR-98	1.29909	1.14996	0.428937	0.999213
mmu-miR-99a-4373008	mmu-miR-99a	1.0622	0.975328	0.849006	0.999213
mmu-miR-99b-4373007	mmu-miR-99b	1.21699	1.04762	0.414618	0.999213
rno-miR-1-4395765	rno-miR-1	1.35473	1.01577	0.398533	0.999213
rno-miR-17-3p-4395779	rno-miR-17-3p	0.810811	0.704901	0.418123	0.999213
rno-miR-190b-4395749	rno-miR-190b	1.80852	1.15496	0.245897	0.999213
rno-miR-207-4381096	rno-miR-207	1.7279	0.909226	0.542318	0.999213
rno-miR-20b-3p-4395753	rno-miR-20b-3p	20.0789	4.63855	0.678397	0.999213
rno-miR-219-1-3p-4395778	rno-miR-219-1-3p	0.788077	0.623286	0.586625	0.999213
rno-miR-219-2-3p-4395501	rno-miR-219-2-3p	1.07618	1.10676	0.877426	0.999213
rno-miR-224-4373187	rno-miR-224	0.923524	0.458272	0.178462	0.999213
rno-miR-333-4381109	rno-miR-333	1.20752	1.02818	0.700619	0.999213
rno-miR-336-4381111	rno-miR-336	0.654946	0.946873	0.0529724	0.999213
rno-miR-339-3p-4395760	rno-miR-339-3p	1.14016	1.14858	0.584252	0.999213
rno-miR-344-3p-4381112	rno-miR-344-3p	1.02922	1.072	0.877102	0.999213
rno-miR-345-3p-4395762	rno-miR-345-3p	1.1183	0.931337	0.527136	0.999213
rno-miR-346-4381113	rno-miR-346	1.23485	1.25923	0.393402	0.999213
rno-miR-347-4381114	rno-miR-347	0.858107	1.0733	0.749555	0.999213
rno-miR-351-4395764	rno-miR-351	1.02833	0.868091	0.542919	0.999213
rno-miR-377-4381100	rno-miR-377	1.16966	0.842251	0.565163	0.999213
rno-miR-381-4381102	rno-miR-381	1.18199	1.14295	0.697039	0.999213
rno-miR-409-5p-4381098	rno-miR-409-5p	1.29069	0.957302	0.641387	0.999213
rno-miR-421-4381122	rno-miR-421	1.18098	1.18184	0.717136	0.999213
rno-miR-450a-4381124	rno-miR-450a	0.982407	0.88656	0.84991	0.999213
rno-miR-466b-4395767	rno-miR-466b	0.838208	1.29889	0.454712	0.999213
rno-miR-466c-4395768	rno-miR-466c	1.01438	0.461943	0.0479455	0.999213
rno-miR-505-4381097	rno-miR-505	1.35581	1.0136	0.418788	0.999213
rno-miR-532-5p-4395752	rno-miR-532-5p	0.968368	0.849503	0.648875	0.999213
rno-miR-543-4395766	rno-miR-543	1.95615	0.00623433	1.58725e-05	0.00149201
rno-miR-598-5p-4395754	rno-miR-598-5p	0.920564	0.963796	0.918299	0.999213
rno-miR-758-4395180	rno-miR-758	0.998018	0.954956	0.935408	0.999213
rno-miR-760-5p-4395758	rno-miR-760-5p	859.218	780.958	2.36311e-06	0.00040188
